# Supplementary material
Source: publisher site journal article supplement (https://www.dovepress.com/get_supplementary_file.php?f=423177.docx)
Supplement: Supplementary file 1 [file get_supplementary_file.php]

# *Table S1*

| Table S1 Raw data from female AGA patients. | | | | | | | | | | |
| --- | --- | --- | --- | --- | --- | --- | --- | --- | --- | --- |
|  | **DATE** | **SEX** | **AGE** | **VD** | **Testosterone** | **Estrogen** | **DHEA** | **SHBG** | **Hair.Density** | **Vellus.Ratio** |
| **2** | 2021/8/19 | female | 17 | 18.3 | 82.21 | 25 | 404 | 21.4 | 137.9 | 12.6 |
| **4** | 2021/6/2 | female | 18 | 17.3 | 46.01 | 22 | 331.9 | 40.8 | 124.1 | 7.8 |
| **5** | 2021/8/13 | female | 18 | 11.9 | 46.54 | 54 | 136.5 | 49.8 | 176 | 16.1 |
| **7** | 2021/10/10 | female | 18 | 8.71 | 48.79 | 22 | 304.8 | 38.1 | 96.3 | 16.5 |
| **9** | 2021/12/9 | female | 18 | 7.92 | 61.44 | 68.52 | 298.3 | 33.4 | 122.7 | 18.1 |
| **10** | 2021/1/2 | female | 19 | 7.62 | 79.65 | 52 | 475.2 | 24.3 | 149 | 17.7 |
| **11** | 2021/1/14 | female | 19 | 13.3 | 63.56 | 40 | 402.9 | 47.3 | 185 | 15.4 |
| **12** | 2021/6/12 | female | 19 | 11.8 | 54.26 | 31 | 161.8 | 99.2 | 128.9 | 17.2 |
| **13** | 2021/7/29 | female | 19 | 14.6 | 32.84 | 29 | 177.1 | 67.3 | 195.4 | 20.9 |
| **14** | 2021/10/17 | female | 19 | 9.36 | 86.48 | 8.67 | 252.9 | 31.9 | 153.9 | 26.1 |
| **15** | 2021/4/5 | female | 20 | 24.1 | 73.54 | 26 | 369.5 | 24.3 | 124.1 | 16.2 |
| **16** | 2021/6/3 | female | 20 | 27.8 | 100.47 | 70 | 471.3 | 19.9 | 128.9 | 37.6 |
| **17** | 2021/10/28 | female | 20 | 11.9 | 68.19 | 28.72 | 256.9 | 69.6 | 131 | 16.9 |
| **19** | 2021/7/8 | female | 21 | 11.3 | 41 | 51 | 192.9 | 26.1 | 197.5 | 9.8 |
| **20** | 2021/9/11 | female | 21 | 18.6 | 72.09 | 38 | 298.1 | 32 | 121.3 | 16.6 |
| **21** | 2021/9/30 | female | 21 | 11.3 | 53.19 | 27 | 168.6 | 85.6 | 167.7 | 8.3 |
| **22** | 2021/10/10 | female | 21 | 12.8 | 61.53 | 24.13 | 298 | 24.1 | 107.4 | 18.7 |
| **23** | 2021/10/10 | female | 21 | 13.1 | 54.23 | 26 | 233.9 | 59.5 | 99.1 | 43.4 |
| **24** | 2021/11/16 | female | 21 | 17.8 | 42.29 | 18.89 | 254.5 | 48.6 | 94.3 | 11.8 |
| **25** | 2021/12/2 | female | 21 | 19.1 | 44.72 | 29.87 | 309.9 | 47.5 | 133.1 | 15.1 |
| **26** | 2021/1/7 | female | 22 | 10.2 | 43.32 | 19 | 282.2 | 89.3 | 237.7 | 24.5 |
| **28** | 2021/1/12 | female | 22 | 10.8 | 65.45 | 22 | 423.8 | 27.3 | 131.7 | 15.8 |
| **29** | 2021/5/6 | female | 22 | 7.26 | 50.75 | 30 | 493.7 | 47.3 | 160.1 | 22.9 |
| **30** | 2021/5/20 | female | 22 | 8.2 | 98.58 | 35 | 365.4 | 58.7 | 149.7 | 32.4 |
| **31** | 2021/5/27 | female | 22 | 15 | 54.22 | 33 | 321.8 | 16 | 99.1 | 27.3 |
| **32** | 2021/7/22 | female | 22 | 20.9 | 37.53 | 51 | 154.2 | 120.8 | 218.3 | 10.5 |
| **33** | 2021/7/22 | female | 22 | 21.1 | 92.58 | 48 | 502.5 | 47 | 192 | 21.7 |
| **34** | 2021/9/30 | female | 22 | 13.9 | 64.81 | 22.34 | 374.6 | 48.4 | 133.1 | 21.4 |
| **36** | 2021/11/30 | female | 22 | 15.3 | 72.48 | 21.95 | 308.4 | 29.4 | 136.5 | 24.4 |
| **37** | 2021/12/2 | female | 22 | 11.3 | 78 | 18.41 | 314.1 | 31 | 205.1 | 19.6 |
| **38** | 2021/12/12 | female | 22 | 19.6 | 42.78 | 19.6 | 214.2 | 31.1 | 115.7 | 32.3 |
| **39** | 2021/1/19 | female | 23 | 13.8 | 70.69 | 132 | 410.3 | 30.7 | 152.5 | 26.4 |
| **41** | 2021/5/7 | female | 23 | 16.2 | 51.28 | 43 | 281.5 | 55.3 | 128.2 | 22.2 |
| **42** | 2021/7/1 | female | 23 | 9.7 | 56.84 | 63 | 256.9 | 60.5 | 151 | 9.2 |
| **43** | 2021/8/13 | female | 23 | 19.8 | 53.15 | 85 | 381.5 | 73.1 | 113.7 | 18.9 |
| **44** | 2021/9/2 | female | 23 | 12.4 | 48.6 | 46 | 198.7 | 43 | 171.9 | 12.5 |
| **45** | 2021/9/11 | female | 23 | 15.1 | 22.69 | 14 | 152.5 | 36.1 | 121.3 | 29.7 |
| **46** | 2021/10/14 | female | 23 | 11.2 | 36.46 | 17.66 | 188.8 | 30.2 | 99.8 | 15.3 |
| **47** | 2021/10/26 | female | 23 | 9.63 | 72.46 | 14.15 | 557.2 | 21.8 | 167.7 | 18.6 |
| **48** | 2021/11/1 | female | 23 | 10.9 | 60.38 | 25.17 | 378.3 | 20 | 140.7 | 38.9 |
| **49** | 2021/11/11 | female | 23 | 8.54 | 45.38 | 20.79 | 300.4 | 41.4 | 119.2 | 7 |
| **50** | 2021/12/25 | female | 23 | 14.5 | 54.05 | 20.77 | 240.6 | 30.7 | 114.4 | 27.9 |
| **51** | 2021/1/21 | female | 24 | 9.39 | 21.86 | 31 | 151 | 13.1 | 113.7 | 23.2 |
| **52** | 2021/4/1 | female | 24 | 9.51 | 58.58 | 25 | 400.6 | 32.6 | 174 | 15.1 |
| **53** | 2021/5/6 | female | 24 | 11.4 | 50.92 | 79 | 282 | 32.6 | 156.6 | 12.4 |
| **54** | 2021/8/12 | female | 24 | 12.8 | 40.82 | 19 | 266.1 | 39.8 | 121.3 | 38.9 |
| **55** | 2021/8/26 | female | 24 | 10.1 | 49.04 | 29 | 235 | 21.6 | 117.8 | 22.4 |
| **56** | 2021/9/14 | female | 24 | 20.5 | 45.25 | 31 | 238.3 | 44.6 | 193.4 | 22.6 |
| **57** | 2021/9/19 | female | 24 | 19.5 | 81.84 | 71 | 287.8 | 65.4 | 182.3 | 22.8 |
| **58** | 2021/10/14 | female | 24 | 7.22 | 77.75 | 39.34 | 266.2 | 106.6 | 158.7 | 25.9 |
| **59** | 2021/10/28 | female | 24 | 12.1 | 41.6 | 42 | 213.1 | 72.7 | 131.7 | 6.8 |
| **61** | 2021/11/11 | female | 24 | 19.1 | 113.89 | 13.21 | 709.3 | 19.4 | 152.5 | 19.1 |
| **62** | 2021/11/29 | female | 24 | 11 | 49.41 | 45.54 | 165.7 | 55.5 | 155.9 | 12 |
| **64** | 2021/12/9 | female | 24 | 9.28 | 86.94 | 37.21 | 332 | 75.5 | 167.7 | 12 |
| **65** | 2021/2/25 | female | 25 | 12.2 | 113.8 | 39 | 398.4 | 13.8 | 90.8 | 26.7 |
| **67** | 2021/8/11 | female | 25 | 11.1 | 44.7 | 49 | 261 | 28.9 | 149.7 | 22.2 |
| **68** | 2021/8/31 | female | 25 | 16 | 9.83 | 34 | 97.9 | 61.8 | 117.1 | 11.2 |
| **69** | 2021/9/15 | female | 25 | 6.13 | 19 | 41 | 131.8 | 39.7 | 126.8 | 25 |
| **70** | 2021/9/23 | female | 25 | 7.76 | 45.29 | 55 | 289.5 | 57.4 | 86.6 | 15.2 |
| **71** | 2021/10/28 | female | 25 | 8.55 | 29.68 | 31.99 | 234.1 | 46.6 | 189.9 | 24.5 |
| **72** | 2021/10/30 | female | 25 | 7.52 | 69.1 | 27.81 | 302.4 | 44.8 | 126.1 | 14.8 |
| **73** | 2021/12/5 | female | 25 | 9.13 | 47.77 | 38.3 | 285.9 | 65.8 | 151.8 | 10 |
| **74** | 2021/3/25 | female | 26 | 11.7 | 42.14 | 34 | 234 | 13.7 | 95 | 18.2 |
| **75** | 2021/7/17 | female | 26 | 10.3 | 91.34 | 37 | 281.5 | 67.1 | 183.7 | 10.2 |
| **76** | 2021/8/25 | female | 26 | 16 | 35.34 | 18 | 168.5 | 44.4 | 80.4 | 24.1 |
| **77** | 2021/11/4 | female | 26 | 11.3 | 93.77 | 25.04 | 495.9 | 32.6 | 137.2 | 33.8 |
| **78** | 2021/11/4 | female | 26 | 18.7 | 26.87 | 36.78 | 136.7 | 83.5 | 144.9 | 12 |
| **79** | 2021/11/9 | female | 26 | 17.8 | 87.97 | 34.35 | 269.7 | 55.8 | 118.5 | 21.1 |
| **81** | 2021/3/8 | female | 27 | 10.4 | 57.35 | 46 | 203 | 59.7 | 106 | 13.7 |
| **82** | 2021/10/11 | female | 27 | 13.4 | 42.05 | 34 | 143 | 88.3 | 204.5 | 21 |
| **83** | 2021/10/15 | female | 27 | 8.6 | 73.8 | 32.65 | 350.7 | 48.7 | 193.4 | 18.3 |
| **84** | 2021/10/17 | female | 27 | 6.61 | 25.95 | 34.8 | 135.5 | 46.8 | 120.6 | 19.5 |
| **85** | 2021/11/27 | female | 27 | 21.2 | 148.31 | 28.31 | 388 | 45.2 | 108.1 | 6.4 |
| **86** | 2021/12/6 | female | 27 | 12.1 | 70.19 | 38.15 | 313.5 | 42.9 | 149.7 | 16.7 |
| **87** | 2021/12/9 | female | 27 | 13.7 | 55.17 | 33.77 | 213 | 33.7 | 105.3 | 20.4 |
| **89** | 2021/8/12 | female | 28 | 7.96 | 69.65 | 56 | 180.4 | 81.8 | 158.7 | 23.1 |
| **90** | 2021/8/26 | female | 28 | 16.8 | 33.86 | 47 | 174.5 | 31.4 | 74.2 | 65.4 |
| **91** | 2021/9/2 | female | 28 | 10.4 | 40.17 | 28 | 177.7 | 72.6 | 115 | 21.1 |
| **92** | 2021/9/2 | female | 28 | 11.4 | 68.42 | 33 | 416.7 | 12.1 | 98.4 | 23.9 |
| **93** | 2021/9/24 | female | 28 | 12 | 44.86 | 24.57 | 237 | 33.1 | 80.2 | 15 |
| **94** | 2021/10/14 | female | 28 | 9.94 | 110.83 | 23 | 182.5 | 51.8 | 126.1 | 22.5 |
| **95** | 2021/11/4 | female | 28 | 5.49 | 49.24 | 18.42 | 229.4 | 88.3 | 106.7 | 11 |
| **96** | 2021/1/12 | female | 29 | 11.3 | 36.86 | 26 | 260 | 48.3 | 159.4 | 27.8 |
| **97** | 2021/6/24 | female | 29 | 15.1 | 59.23 | 47 | 372.6 | 60.9 | 194.1 | 17.1 |
| **98** | 2021/7/8 | female | 29 | 10.7 | 42.98 | 61 | 193.2 | 51.7 | 135.1 | 32.8 |
| **99** | 2021/9/13 | female | 29 | 11.6 | 43.93 | 43 | 190.9 | 45.7 | 130.3 | 16 |
| **101** | 2021/10/16 | female | 29 | 9.13 | 56.81 | 19.18 | 270.9 | 26 | 151.8 | 12.8 |
| **102** | 2021/10/24 | female | 29 | 15.9 | 69.11 | 37.29 | 172 | 66.1 | 123.4 | 28.7 |
| **103** | 2021/11/25 | female | 29 | 10.2 | 45.48 | 25.05 | 212.9 | 47.4 | 134.5 | 41.2 |
| **104** | 2021/1/24 | female | 30 | 14.1 | 46.18 | 27 | 267.2 | 48.9 | 176 | 29.5 |
| **105** | 2021/3/4 | female | 30 | 13.9 | 47.41 | 30 | 290 | 27.9 | 126.8 | 18 |
| **106** | 2021/7/11 | female | 30 | 18.5 | 51.24 | 38 | 189.5 | 60.2 | 117.1 | 36.7 |
| **110** | 2021/9/16 | female | 30 | 26.5 | 61.51 | 29 | 350.6 | 41.6 | 86.6 | 11.2 |
| **111** | 2021/12/2 | female | 30 | 13.6 | 51.31 | 31.12 | 306.1 | 36.3 | 111.6 | 11.2 |
| **112** | 2021/12/4 | female | 30 | 13.3 | 82.4 | 41.71 | 437.4 | 45.5 | 165 | 24.4 |
| **113** | 2021/12/7 | female | 30 | 19.2 | 67.36 | 24.97 | 454.9 | 26.6 | 149.7 | 16.2 |
| **114** | 2021/3/30 | female | 31 | 14.1 | 45.19 | 31 | 301.6 | 51.5 | 101.9 | 13.6 |
| **115** | 2021/4/15 | female | 31 | 13 | 25.69 | 54 | 185.8 | 53 | 138.6 | 6 |
| **116** | 2021/6/3 | female | 31 | 23.5 | 42.82 | 25 | 188.5 | 25.4 | 119.9 | 11 |
| **118** | 2021/8/25 | female | 31 | 11.2 | 80.06 | 25.44 | 307.1 | 40.5 | 124.1 | 3.9 |
| **119** | 2021/9/6 | female | 31 | 20.6 | 46.36 | 22.13 | 291.4 | 70.9 | 158.7 | 5.2 |
| **121** | 2021/11/9 | female | 31 | 23.1 | 34.54 | 20.33 | 232 | 34 | 143.5 | 30.9 |
| **122** | 2021/11/15 | female | 31 | 8.63 | 56.23 | 24.94 | 152.5 | 61.1 | 162.9 | 8.7 |
| **123** | 2021/11/30 | female | 31 | 19.9 | 59.75 | 21.12 | 295.2 | 46.3 | 100.5 | 16.6 |
| **124** | 2021/12/16 | female | 31 | 13.3 | 53.14 | 17.88 | 240.9 | 23.3 | 118.5 | 32.2 |
| **125** | 2021/1/5 | female | 32 | 11.9 | 46.09 | 3 | 181.1 | 36.1 | 128.2 | 26.5 |
| **126** | 2021/3/3 | female | 32 | 11.8 | 65.39 | 75 | 256.8 | 37.8 | 125.4 | 54.1 |
| **127** | 2021/3/14 | female | 32 | 10.6 | 90.78 | 67 | 230.5 | 45.3 | 113 | 15.3 |
| **128** | 2021/3/25 | female | 32 | 12.9 | 70.12 | 38 | 541.8 | 41.4 | 124.1 | 21.2 |
| **129** | 2021/7/29 | female | 32 | 24.3 | 60.88 | 45 | 165 | 52.9 | 162.9 | 20.9 |
| **130** | 2021/8/26 | female | 32 | 17.3 | 39.68 | 23 | 136.8 | 42.7 | 95.6 | 21 |
| **131** | 2021/9/16 | female | 32 | 9.3 | 32.09 | 8 | 174.7 | 69.6 | 136.5 | 9.6 |
| **132** | 2021/9/23 | female | 32 | 12.6 | 51.35 | 46 | 193 | 73.6 | 172.6 | 14.9 |
| **133** | 2021/10/6 | female | 32 | 10.1 | 38.66 | 18 | 189 | 55 | 84.6 | 27 |
| **134** | 2021/10/19 | female | 32 | 17.3 | 45.77 | 16.8 | 202.3 | 20.3 | 112.3 | 35.8 |
| **135** | 2021/12/2 | female | 32 | 9.06 | 46.67 | 36.29 | 203.3 | 75 | 99.1 | 11.2 |
| **136** | 2021/12/9 | female | 32 | 9.48 | 63.87 | 31.22 | 181 | 44.7 | 120.6 | 19 |
| **137** | 2021/12/23 | female | 32 | 37.3 | 97 | 39.85 | 410.9 | 24.1 | 118.5 | 52.6 |
| **138** | 2021/12/30 | female | 32 | 11.4 | 31.95 | 41.45 | 238 | 40.5 | 89.4 | 17.8 |
| **140** | 2021/3/23 | female | 33 | 10.6 | 32.58 | 80 | 154 | 80.1 | 120 | 24.1 |
| **141** | 2021/4/7 | female | 33 | 8.71 | 65.04 | 54 | 402.3 | 17.3 | 171.2 | 38.9 |
| **142** | 2021/6/3 | female | 33 | 36.2 | 36.91 | 53 | 190.6 | 92.1 | 75.5 | 32.1 |
| **143** | 2021/9/2 | female | 33 | 27.5 | 41.75 | 93 | 150.5 | 55.5 | 142.8 | 12.6 |
| **144** | 2021/9/30 | female | 33 | 19.6 | 69.41 | 62 | 268.1 | 138.3 | 160.1 | 22.9 |
| **145** | 2021/10/14 | female | 33 | 19.8 | 38.35 | 19.59 | 205.1 | 25.3 | 119.9 | 27.7 |
| **146** | 2021/10/17 | female | 33 | 11.3 | 63.79 | 23.65 | 254.9 | 57 | 76.9 | 25.2 |
| **147** | 2021/10/28 | female | 33 | 13.7 | 55.76 | 32.66 | 397.1 | 31.5 | 97 | 28.6 |
| **148** | 2021/11/18 | female | 33 | 8.71 | 83.12 | 74.14 | 336.3 | 142.6 | 126.1 | 20.9 |
| **149** | 2021/12/2 | female | 33 | 16.6 | 59.14 | 24.65 | 441 | 11.6 | 80.4 | 15.5 |
| **150** | 2021/1/19 | female | 34 | 9.69 | 20.95 | 16 | 184.8 | 51.7 | 131.7 | 21.1 |
| **151** | 2021/4/1 | female | 34 | 15.9 | 16.58 | 19 | 194.2 | 59.7 | 180 | 15 |
| **152** | 2021/4/7 | female | 34 | 6.56 | 27.17 | 32 | 181.8 | 68 | 81.1 | 6 |
| **153** | 2021/4/8 | female | 34 | 15.8 | 49.52 | 33 | 157 | 43.9 | 76.2 | 10.9 |
| **154** | 2021/4/15 | female | 34 | 5.23 | 80.39 | 54 | 385.7 | 39.6 | 126.8 | 15.3 |
| **155** | 2021/7/6 | female | 34 | 18.3 | 46.43 | 33 | 195.7 | 22.5 | 94.3 | 18.4 |
| **156** | 2021/7/12 | female | 34 | 12 | 34.03 | 40 | 201.1 | 41 | 88.7 | 39.1 |
| **158** | 2021/9/30 | female | 34 | 10.2 | 50.42 | 67 | 159.1 | 86.8 | 114.4 | 18.8 |
| **159** | 2021/10/10 | female | 34 | 6.41 | 91.2 | 37 | 339.3 | 12.1 | 101.2 | 26.7 |
| **160** | 2021/11/25 | female | 34 | 12.5 | 27.62 | 28.48 | 69.9 | 68 | 196.1 | 10.6 |
| **161** | 2021/1/14 | female | 35 | 11.2 | 48.99 | 31 | 201 | 34 | 138.6 | 15 |
| **162** | 2021/8/26 | female | 35 | 26.6 | 42.07 | 43 | 132.6 | 78.8 | 160.1 | 14.7 |
| **163** | 2021/9/9 | female | 35 | 32.6 | 24.49 | 44 | 128.8 | 101.5 | 128.2 | 15.7 |
| **164** | 2021/12/21 | female | 35 | 12.2 | 61.03 | 27.03 | 315.3 | 43 | 135.8 | 46.4 |
| **165** | 2021/1/28 | female | 36 | 9.3 | 34.03 | 22 | 196.9 | 58.5 | 150.4 | 11.1 |
| **166** | 2021/2/18 | female | 36 | 11.7 | 38.1 | 41 | 164.4 | 35.1 | 109.5 | 13.4 |
| **169** | 2021/7/1 | female | 36 | 22.8 | 29.39 | 27 | 112.8 | 81.7 | 121.3 | 26.9 |
| **170** | 2021/8/28 | female | 36 | 14.9 | 67.89 | 33 | 500.5 | 20.9 | 172.6 | 20.5 |
| **171** | 2021/10/21 | female | 36 | 4.49 | 39.42 | 29 | 193 | 27.2 | 148.3 | 27.6 |
| **172** | 2021/11/18 | female | 36 | 14.1 | 37.96 | 29.93 | 146.3 | 41.6 | 140.7 | 10.8 |
| **173** | 2021/1/21 | female | 37 | 25.7 | 42.6 | 28 | 166 | 13 | 83.2 | 44.2 |
| **174** | 2021/9/16 | female | 37 | 16.5 | 53.44 | 53 | 142.1 | 17.2 | 165 | 42.9 |
| **176** | 2021/10/22 | female | 38 | 13.5 | 12.93 | 34.18 | 172.9 | 50.3 | 128.9 | 21 |
| **178** | 2021/10/26 | female | 38 | 6.84 | 101.46 | 36.94 | 230.4 | 77.5 | 76.9 | 34.2 |
| **179** | 2021/4/29 | female | 39 | 23.9 | 26.71 | 46 | 71.9 | 36.8 | 114.4 | 10.9 |
| **180** | 2021/5/3 | female | 39 | 7.34 | 59.91 | 39 | 177.9 | 37.2 | 109.5 | 19.6 |
| **181** | 2021/10/20 | female | 39 | 11.4 | 40.07 | 59.56 | 9.7 | 102.3 | 114.4 | 29.7 |
| **182** | 2021/12/11 | female | 39 | 8.5 | 45.63 | 23.8 | 276.7 | 21.8 | 165.6 | 11.3 |
| **183** | 2021/12/23 | female | 39 | 10.4 | 26.19 | 19.58 | 176.7 | 31.3 | 97 | 18.6 |
| **184** | 2021/12/14 | female | 40 | 18.8 | 56.49 | 28.52 | 376.7 | 60.1 | 198.2 | 19.9 |
| **185** | 2021/9/7 | female | 41 | 18.5 | 49.1 | 16 | 168.2 | 36.4 | 63.1 | 8.8 |
| **186** | 2021/10/28 | female | 41 | 18.7 | 18.48 | 21.55 | 111.4 | 24.6 | 159.4 | 23.5 |
| **187** | 2021/12/2 | female | 41 | 8.29 | 31.71 | 57.18 | 147.5 | 43.6 | 118.5 | 19.9 |
| **188** | 2021/11/23 | female | 42 | 16.1 | 54.05 | 34.46 | 230.7 | 35.3 | 156.6 | 24.8 |
| **189** | 2021/3/24 | female | 43 | 10.8 | 23.73 | 78 | 160.1 | 85 | 62.4 | 55.6 |
| **190** | 2021/8/26 | female | 44 | 21.1 | 33.53 | 49 | 145.2 | 30.8 | 76.2 | 20.9 |
| **191** | 2021/9/20 | female | 44 | 14.5 | 41.72 | 65 | 127.6 | 72.7 | 185.7 | 11.2 |
| **192** | 2021/10/2 | female | 44 | 11.9 | 30.82 | 48 | 104.8 | 57.7 | 147.6 | 8 |
| **193** | 2021/10/8 | female | 44 | 24.3 | 36.23 | 129 | 186.6 | 24.6 | 92.2 | 18.8 |
| **194** | 2021/11/9 | female | 44 | 16.9 | 59.75 | 29.38 | 220.2 | 80.4 | 181.6 | 15.6 |
| **195** | 2021/11/3 | female | 45 | 12.8 | 51.12 | 65.16 | 190.6 | 48.7 | 147.6 | 16 |
| **196** | 2021/9/27 | female | 46 | 11.6 | 58.06 | 63 | 270.6 | 25.8 | 99.8 | 7.6 |
| **197** | 2021/10/4 | female | 51 | 15 | 21.46 | 3 | 85.5 | 46.3 | 52.7 | 18.4 |
| **200** | 2021/9/30 | female | 57 | 16.9 | 17.11 | 26 | 65.9 | 30.8 | 76.2 | 28.2 |

# *Table S2*

| Table S2 Raw data from male AGA patients. | | | | | | | | | | |
| --- | --- | --- | --- | --- | --- | --- | --- | --- | --- | --- |
|  | **DATE** | **SEX** | **AGE** | **VD** | **Testosterone** | **Estrogen** | **DHEA** | **SHBG** | **Hair.Density** | **Vellus.Ratio** |
| **1** | 2021/10/4 | male | 14 | 16.7 | 404.59 | 18 | 212.6 | 17.7 | 88 | 33.1 |
| **2** | 2021/11/4 | male | 15 | 11.9 | 507.3 | 23.31 | 360.2 | 16.4 | 118.5 | 22.2 |
| **3** | 2021/1/2 | male | 16 | 17 | 245.22 | 19 | 241.8 | 14.3 | 117.1 | 27.2 |
| **4** | 2021/6/19 | male | 17 | 13.5 | 608.21 | 39 | 403.9 | 14.5 | 128.9 | 15.6 |
| **5** | 2021/12/16 | male | 17 | 22.4 | 486.62 | 31.48 | 409.2 | 14.7 | 117.1 | 25.4 |
| **6** | 2021/9/21 | male | 18 | 16.2 | 571.36 | 27 | 341.1 | 35.1 | 107.4 | 27.7 |
| **7** | 2021/11/4 | male | 19 | 13.9 | 394.72 | 20.84 | 497.4 | 12.4 | 123.4 | 29.2 |
| **8** | 2021/1/7 | male | 20 | 14.2 | 429.76 | 52 | 391.1 | 20.4 | 197.5 | 14.4 |
| **9** | 2021/4/13 | male | 20 | 7.3 | 355.96 | 41 | 399.7 | 25.4 | 137.2 | 54 |
| **10** | 2021/10/18 | male | 20 | 16.7 | 502.41 | 14 | 274.7 | 23.3 | 146.2 | 23.2 |
| **11** | 2021/10/28 | male | 20 | 20.3 | 511.13 | 25.85 | 453.6 | 45.9 | 185 | 19.5 |
| **12** | 2021/11/21 | male | 20 | 21.2 | 382.3 | 21.42 | 426.5 | 18.1 | 158.7 | 14.8 |
| **13** | 2021/2/25 | male | 21 | 15 | 422.13 | 48 | 333.6 | 11 | 124.8 | 29.4 |
| **14** | 2021/8/25 | male | 21 | 22.5 | 314.79 | 25 | 491.3 | 12.7 | 88.7 | 43 |
| **15** | 2021/1/5 | male | 22 | 22.3 | 514.99 | 61 | 655.7 | 23.3 | 166.3 | 16 |
| **16** | 2021/1/26 | male | 22 | 10.5 | 504.49 | 48 | 233.2 | 25.7 | 153.7 | 31.7 |
| **17** | 2021/2/22 | male | 22 | 26.4 | 570.89 | 40 | 111.3 | 23.9 | 112.3 | 44.4 |
| **18** | 2021/4/20 | male | 22 | 10.8 | 683.57 | 36 | 153.9 | 34.4 | 133.1 | 27.6 |
| **19** | 2021/9/21 | male | 22 | 21.8 | 465.12 | 23 | 402.3 | 30.7 | 137.9 | 51.3 |
| **20** | 2021/9/24 | male | 22 | 21.1 | 519.88 | 40 | 285.5 | 28.3 | 131.7 | 14.7 |
| **21** | 2021/10/27 | male | 22 | 20.9 | 746.67 | 37.88 | 322.1 | 22.6 | 220.4 | 41.8 |
| **22** | 2021/12/9 | male | 22 | 12.3 | 685.65 | 40.36 | 316.2 | 37.2 | 143.5 | 38.2 |
| **24** | 2021/4/8 | male | 23 | 17 | 519.08 | 51 | 234.5 | 27.1 | 95.6 | 17.4 |
| **26** | 2021/5/6 | male | 23 | 22.8 | 513.78 | 53 | 424.2 | 29.8 | 185 | 35.8 |
| **27** | 2021/5/18 | male | 23 | 12.8 | 277.77 | 49 | 247.9 | 9.7 | 137.9 | 18.6 |
| **28** | 2021/11/7 | male | 23 | 10.5 | 445.35 | 14.34 | 480.5 | 22.6 | 97 | 16.4 |
| **29** | 2021/1/5 | male | 24 | 12.4 | 495.39 | 37 | 288.9 | 25.7 | 153.9 | 45 |
| **30** | 2021/6/27 | male | 24 | 24.5 | 488.3 | 40 | 277.2 | 27.2 | 160.1 | 26.4 |
| **31** | 2021/9/28 | male | 24 | 14.1 | 725.6 | 42 | 236.3 | 36.4 | 158 | 17.5 |
| **32** | 2021/9/30 | male | 24 | 20.1 | 560.8 | 69 | 544.7 | 12.6 | 139.3 | 17.9 |
| **33** | 2021/10/12 | male | 24 | 12 | 452.34 | 70 | 327.1 | 31.3 | 95.6 | 22.5 |
| **34** | 2021/10/12 | male | 24 | 16.4 | 491.99 | 41 | 207.6 | 15.1 | 113.8 | 63.7 |
| **35** | 2021/10/14 | male | 24 | 26.2 | 482.94 | 28 | 258 | 25.7 | 141.4 | 31.9 |
| **36** | 2021/11/22 | male | 24 | 20.6 | 451.73 | 23.66 | 379.3 | 27.2 | 145.5 | 28.6 |
| **37** | 2021/12/8 | male | 24 | 16.8 | 381.08 | 39.57 | 295.6 | 11.9 | 124.1 | 18.4 |
| **38** | 2021/12/28 | male | 24 | 23.6 | 300.16 | 39 | 319.9 | 8.2 | 210.7 | 23 |
| **39** | 2021/4/8 | male | 25 | 14 | 627.08 | 51 | 463.8 | 20 | 131 | 14.8 |
| **40** | 2021/5/6 | male | 25 | 13.2 | 364.47 | 50 | 361.9 | 11.3 | 162.9 | 41.7 |
| **42** | 2021/10/12 | male | 25 | 9.55 | 396.59 | 61 | 1179 | 12 | 117.1 | 46.7 |
| **43** | 2021/11/4 | male | 25 | 18.3 | 392.57 | 19.75 | 227.7 | 27.6 | 122.7 | 37.9 |
| **44** | 2021/11/4 | male | 25 | 15.5 | 533.15 | 29.46 | 471.5 | 17.8 | 151.8 | 17.8 |
| **45** | 2021/11/30 | male | 25 | 23.9 | 730.41 | 27.43 | 300.1 | 44.1 | 149.7 | 39.8 |
| **46** | 2021/12/5 | male | 25 | 10.3 | 443.06 | 26.45 | 306.6 | 20.1 | 135.1 | 16.9 |
| **47** | 2021/12/14 | male | 25 | 21 | 495.59 | 32.18 | 270.4 | 28.6 | 140.7 | 23.2 |
| **48** | 2021/12/16 | male | 25 | 14.2 | 361.01 | 23.63 | 423 | 6.4 | 160.1 | 52.4 |
| **49** | 2021/2/2 | male | 26 | 9.52 | 341.36 | 50 | 409.9 | 16.1 | 132.4 | 13.1 |
| **51** | 2021/2/23 | male | 26 | 26 | 552.34 | 25 | 387.6 | 25.1 | 169.1 | 24.2 |
| **52** | 2021/5/6 | male | 26 | 15.7 | 490.53 | 49 | 361.5 | 22.6 | 173.3 | 24.8 |
| **53** | 2021/5/11 | male | 26 | 14.3 | 380.63 | 45 | 271.9 | 22.5 | 125.4 | 53 |
| **54** | 2021/5/19 | male | 26 | 24.2 | 360.16 | 36 | 213 | 16.5 | 207.9 | 20.7 |
| **55** | 2021/7/10 | male | 26 | 19.1 | 355.41 | 41 | 283.5 | 16.3 | 215.5 | 55.3 |
| **58** | 2021/9/23 | male | 26 | 8.23 | 408.87 | 71 | 136.3 | 21.5 | 136.5 | 42.6 |
| **59** | 2021/10/2 | male | 26 | 23.9 | 618.42 | 41 | 251.2 | 24.1 | 142.7 | 13.7 |
| **60** | 2021/11/9 | male | 26 | 11.4 | 415.79 | 8.46 | 452.2 | 23.3 | 166.3 | 11.3 |
| **61** | 2021/11/12 | male | 26 | 20.7 | 474.08 | 23.16 | 163.3 | 18 | 196.8 | 50.4 |
| **62** | 2021/11/18 | male | 26 | 13.7 | 309.94 | 18.11 | 225.6 | 17.1 | 98.3 | 23.9 |
| **64** | 2021/12/2 | male | 26 | 14.3 | 456.71 | 19.03 | 475.1 | 16.7 | 155.9 | 47.1 |
| **65** | 2021/1/19 | male | 27 | 16.3 | 539.43 | 37 | 413.2 | 46.9 | 145.5 | 50 |
| **67** | 2021/7/18 | male | 27 | 18.1 | 493.91 | 47 | 331.5 | 19.4 | 129.6 | 36.4 |
| **68** | 2021/8/2 | male | 27 | 20 | 389.6 | 25 | 470.1 | 28 | 176 | 22.8 |
| **70** | 2021/9/16 | male | 27 | 17.9 | 472.02 | 42 | 286.6 | 20.9 | 143.5 | 22.7 |
| **71** | 2021/9/28 | male | 27 | 20.2 | 525.23 | 16 | 388.9 | 28.3 | 114.4 | 9.7 |
| **72** | 2021/2/23 | male | 28 | 19.6 | 345.26 | 48 | 337.5 | 18.8 | 161.5 | 45.9 |
| **73** | 2021/3/2 | male | 28 | 14.8 | 383.53 | 89 | 562.8 | 6.4 | 176 | 24 |
| **74** | 2021/3/23 | male | 28 | 16.2 | 509.38 | 77 | 334.2 | 31 | 205.8 | 9.4 |
| **75** | 2021/3/30 | male | 28 | 16.7 | 499.68 | 54 | 488.5 | 29.8 | 115 | 34.3 |
| **76** | 2021/4/15 | male | 28 | 12.9 | 451.6 | 63 | 305.1 | 27.7 | 106 | 14.4 |
| **77** | 2021/7/28 | male | 28 | 25.1 | 1016.39 | 32 | 262.4 | 70.6 | 155.9 | 58.7 |
| **78** | 2021/9/30 | male | 28 | 19.6 | 768.61 | 26 | 228.9 | 46.3 | 175.3 | 11.9 |
| **79** | 2021/10/18 | male | 28 | 11.4 | 574.31 | 38 | 586.1 | 13.8 | 147.6 | 27.2 |
| **80** | 2021/10/26 | male | 28 | 12.5 | 419.8 | 29.24 | 178.9 | 17 | 177.4 | 30.5 |
| **81** | 2021/11/4 | male | 28 | 16.9 | 336.56 | 23.91 | 382.1 | 14.2 | 131.7 | 33.2 |
| **82** | 2021/12/2 | male | 28 | 23.6 | 374.62 | 12.94 | 420 | 20.3 | 122.7 | 39 |
| **83** | 2021/12/28 | male | 28 | 23.5 | 345.07 | 16.72 | 316.4 | 14.5 | 131 | 29.6 |
| **84** | 2021/12/30 | male | 28 | 20.2 | 476.9 | 27.02 | 475.7 | 28.4 | 135.8 | 16.3 |
| **85** | 2021/1/5 | male | 29 | 12.1 | 483.36 | 59 | 503.5 | 15.7 | 142.8 | 20.9 |
| **86** | 2021/4/27 | male | 29 | 25.4 | 445.8 | 32 | 307.1 | 21 | 149.7 | 57.4 |
| **87** | 2021/9/23 | male | 29 | 27.6 | 298.72 | 54 | 380.8 | 15.4 | 163.6 | 22.9 |
| **88** | 2021/10/26 | male | 29 | 26.3 | 488.71 | 25.99 | 344.7 | 29 | 83.2 | 38.3 |
| **89** | 2021/11/8 | male | 29 | 20.4 | 412.19 | 17.79 | 547.1 | 12.3 | 124.1 | 18.4 |
| **90** | 2021/11/11 | male | 29 | 17.4 | 244.89 | 17.31 | 287.5 | 5.5 | 160.1 | 50.1 |
| **91** | 2021/11/30 | male | 29 | 20.2 | 300.84 | 17.09 | 392.2 | 15.9 | 160.8 | 30.6 |
| **92** | 2021/2/20 | male | 30 | 23.9 | 389.76 | 29 | 475.9 | 11.6 | 126.1 | 8.2 |
| **93** | 2021/4/27 | male | 30 | 23.1 | 645.98 | 22 | 340.6 | 24.1 | 186.4 | 29.7 |
| **94** | 44327 | male | 30 | 25.4 | 480.25 | 55 | 409 | 17.8 | 169.1 | 30.3 |
| **95** | 2021/7/8 | male | 30 | 11.4 | 454.55 | 28.21 | 187.6 | 26 | 129.6 | 19.8 |
| **96** | 2021/7/8 | male | 30 | 28.3 | 657.96 | 60 | 393.8 | 24.3 | 134.5 | 49 |
| **97** | 2021/9/30 | male | 30 | 14.9 | 467.95 | 30 | 285.8 | 15 | 162.9 | 17.4 |
| **98** | 2021/10/10 | male | 30 | 25.6 | 326.8 | 6 | 236.1 | 17.9 | 134.5 | 25.3 |
| **99** | 2021/11/25 | male | 30 | 21.1 | 527.59 | 31.8 | 271 | 30.7 | 140.7 | 65 |
| **100** | 2021/12/19 | male | 30 | 21.8 | 363.02 | 23.28 | 294.9 | 25.6 | 166.3 | 54.2 |
| **101** | 2021/2/23 | male | 31 | 12 | 409.24 | 42 | 276.4 | 34.6 | 80.4 | 13.8 |
| **102** | 2021/4/20 | male | 31 | 16.9 | 283.19 | 14 | 93.8 | 17.7 | 184.4 | 25.6 |
| **104** | 2021/10/21 | male | 31 | 28.6 | 553.91 | 20.11 | 341.9 | 51.5 | 124.8 | 21.7 |
| **105** | 2021/11/8 | male | 31 | 7.82 | 425.82 | 38.93 | 232.1 | 30 | 114.4 | 69.7 |
| **106** | 2021/11/30 | male | 31 | 21.3 | 535.57 | 46.36 | 293.2 | 18.7 | 142.1 | 51.7 |
| **107** | 2021/5/25 | male | 32 | 16.5 | 472.87 | 23 | 190 | 17 | 153.2 | 42.5 |
| **108** | 2021/6/6 | male | 32 | 21.1 | 535.79 | 29.72 | 209.1 | 29 | 156.6 | 55.8 |
| **109** | 2021/9/16 | male | 32 | 21.9 | 498.01 | 41 | 270.2 | 24.4 | 115 | 45.2 |
| **110** | 2021/9/23 | male | 32 | 15.5 | 401.9 | 10 | 459.8 | 10.2 | 194.8 | 19.9 |
| **111** | 2021/10/21 | male | 32 | 6.94 | 672.95 | 23.19 | 181.7 | 62.9 | 234.3 | 49.6 |
| **112** | 2021/11/9 | male | 32 | 21 | 299.99 | 18.95 | 376.3 | 18 | 165.6 | 18.8 |
| **113** | 2021/11/23 | male | 32 | 24.5 | 397.1 | 23.77 | 274.7 | 15.3 | 117.1 | 21.9 |
| **114** | 2021/12/9 | male | 32 | 21.4 | 545.98 | 22.51 | 235.6 | 24.7 | 100.5 | 35.9 |
| **115** | 2021/2/9 | male | 33 | 13.8 | 357.6 | 34 | 289.7 | 14.8 | 77.6 | 30.4 |
| **116** | 2021/4/13 | male | 33 | 17.9 | 234.32 | 35 | 294 | 11.1 | 140.7 | 57.1 |
| **117** | 2021/5/18 | male | 33 | 15.1 | 479.44 | 63 | 417.5 | 22.5 | 115.7 | 53.9 |
| **118** | 2021/9/11 | male | 33 | 14.7 | 404.16 | 40 | 256.1 | 15.3 | 153.9 | 12.2 |
| **119** | 2021/11/11 | male | 33 | 13.3 | 437.58 | 18.74 | 409.4 | 29.2 | 144.2 | 40.4 |
| **120** | 2021/2/25 | male | 34 | 19.7 | 522.64 | 35 | 242.6 | 25 | 121.3 | 33.7 |
| **121** | 2021/8/21 | male | 34 | 34.1 | 335 | 41 | 411.3 | 17.1 | 216.2 | 38.7 |
| **122** | 2021/9/23 | male | 34 | 7.25 | 483.97 | 30 | 532.4 | 25.8 | 180 | 48.1 |
| **123** | 2021/9/30 | male | 34 | 15 | 260.13 | 30 | 192.4 | 34.5 | 144.9 | 24.3 |
| **124** | 2021/10/28 | male | 34 | 17.4 | 461.58 | 25.13 | 350.3 | 24.5 | 170.5 | 26.4 |
| **125** | 2021/11/23 | male | 34 | 22.1 | 229.29 | 3.04 | 404 | 21.4 | 155.2 | 40.2 |
| **126** | 2021/12/2 | male | 34 | 15 | 542.6 | 27.46 | 277.3 | 28 | 76.2 | 57.3 |
| **127** | 2021/6/5 | male | 35 | 24 | 262.45 | 29 | 437.4 | 11.7 | 158 | 57.5 |
| **128** | 2021/6/25 | male | 35 | 12.4 | 549.79 | 33 | 386.9 | 25.9 | 178.1 | 40.5 |
| **129** | 2021/12/8 | male | 35 | 9.9 | 279.39 | 26.33 | 215 | 8.9 | 115.7 | 38.3 |
| **130** | 2021/12/23 | male | 35 | 28.8 | 391.85 | 26.56 | 222.1 | 19.6 | 119.2 | 26.2 |
| **131** | 2021/5/4 | male | 36 | 16.8 | 604.46 | 50 | 139.4 | 61.8 | 121.3 | 13.7 |
| **132** | 2021/11/18 | male | 36 | 18.2 | 345.25 | 22.14 | 345.4 | 12.8 | 146.2 | 30.3 |
| **133** | 2021/12/19 | male | 36 | 13.4 | 176.82 | 18.88 | 459.5 | 8.6 | 128.9 | 48.4 |
| **134** | 2021/12/23 | male | 36 | 15.4 | 423.94 | 23.63 | 588.8 | 31.9 | 149 | 36.7 |
| **135** | 2021/3/9 | male | 37 | 20.8 | 330.09 | 28 | 248.4 | 19.4 | 142.8 | 86.4 |
| **136** | 2021/10/17 | male | 37 | 20.7 | 327.86 | 23.26 | 306.9 | 25.9 | 160.1 | 58.9 |
| **137** | 2021/11/15 | male | 37 | 23.6 | 497.3 | 31.1 | 262.3 | 38.3 | 137.9 | 34.2 |
| **138** | 2021/12/23 | male | 37 | 29.7 | 373.72 | 11.62 | 242.8 | 16.7 | 130.3 | 46.3 |
| **139** | 2021/12/14 | male | 38 | 20 | 411.36 | 21.29 | 497.5 | 28.1 | 138.6 | 14.5 |
| **141** | 2021/4/20 | male | 40 | 28.3 | 434.64 | 31 | 310.9 | 10.8 | 142.1 | 45.4 |
| **142** | 2021/9/30 | male | 40 | 13.7 | 362.16 | 20 | 354.1 | 32 | 167.7 | 29.8 |
| **143** | 2021/9/30 | male | 40 | 19.8 | 367.19 | 9 | 160.2 | 29.3 | 72.1 | 24 |
| **144** | 2021/4/8 | male | 41 | 16.1 | 438.51 | 42 | 185.5 | 27.5 | 71.4 | 59.2 |
| **145** | 2021/12/16 | male | 43 | 21.4 | 402.74 | 29.96 | 375.7 | 25.8 | 151.8 | 13.2 |
| **147** | 2021/4/6 | male | 59 | 12 | 398.56 | 59 | 118.2 | 23.3 | 194.1 | 42.1 |
| **148** | 2021/4/20 | male | 36 | 17.6 | 313.06 | 44 | 269.2 | 16.4 | 54.1 | 79.5 |
| **149** | 2021/11/29 | male | 20 | 24.9 | 376 | 24.82 | 466.8 | 20.9 | 169.8 | 19.2 |

# *Figure S1* A sample report of the TrichoScan.
